# Supplementary material for: Wild Italian Hyssopus officinalis subsp. aristatus (Godr.) Nyman: From Morphological and Phytochemical Evidences to Biological Activities
Source: Plants (Basel). 2021 Mar 26;10(4):631. doi: 10.3390/plants10040631 (PMC8065824; doi:10.3390/plants10040631)

**Figure S1.** Predicted phytochemical “functional fingerprints”. Physicochemical properties of phytochemicals present in the three EOs (CIV17-EO, NAV19-EO and CdG19-EO) distilled from *H. officinalis* subsp. *aristatus* (Godr.) Nyman aerial parts were used to predict phytochemical pharmacokinetics. The “functional fingerprints” was produced by plotting the phytochemical abundances against their plasma  $T_{max}$  (per PCAP model).

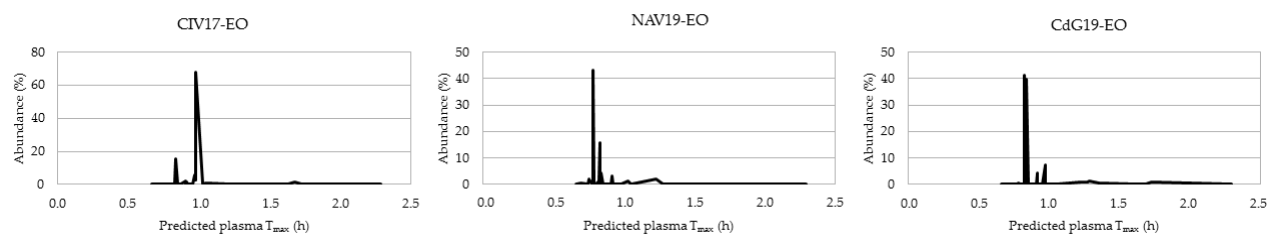

Supplement: Supplementary file 1 [file plants-10-00631-s001.pdf]
